# Supplementary material for: Synthesis of an MXene/polyaniline composite with excellent electrochemical properties
Source: Royal Society of Chemistry journal article supplement (doi:10.1039/d0ta00572j), 2020-01-01
Supplement: d0ta00572j1.pdf [file d0ta00572j1.pdf]

## Supplementary Information

### Synthesis of MXene/Polyaniline Composite with Excellent Electrochemical Properties

Huizhong Xu,<sup>§ab</sup> Dehua Zheng,<sup>§bd</sup> Faqian Liu,<sup>c</sup> Wei Li,<sup>\*a</sup> and Jianjian Lin<sup>\*ab</sup>

<sup>a</sup> *Engineering Research Center of High Performance Polymer and Molding Technology, Ministry of Education, Qingdao University of Science and Technology, Qingdao 266042, China*

*E-mail: weilipku@hotmail.com*

<sup>b</sup> *Key Laboratory of Eco-chemical Engineering, College of Chemistry and Molecular Engineering, Qingdao University of Science and Technology, Qingdao 266042, China*

*E-mail: Jianjian\_Lin@qust.edu.cn*

<sup>c</sup> *School of Chemical Engineering and Technology, Sun Yat-sen University, Zhuhai 519082, China*

<sup>d</sup> *State Key Laboratory of Fine Chemicals, Dalian University of Technology, Dalian 116024, China.*

*§ These authors contributed equally to the work.*

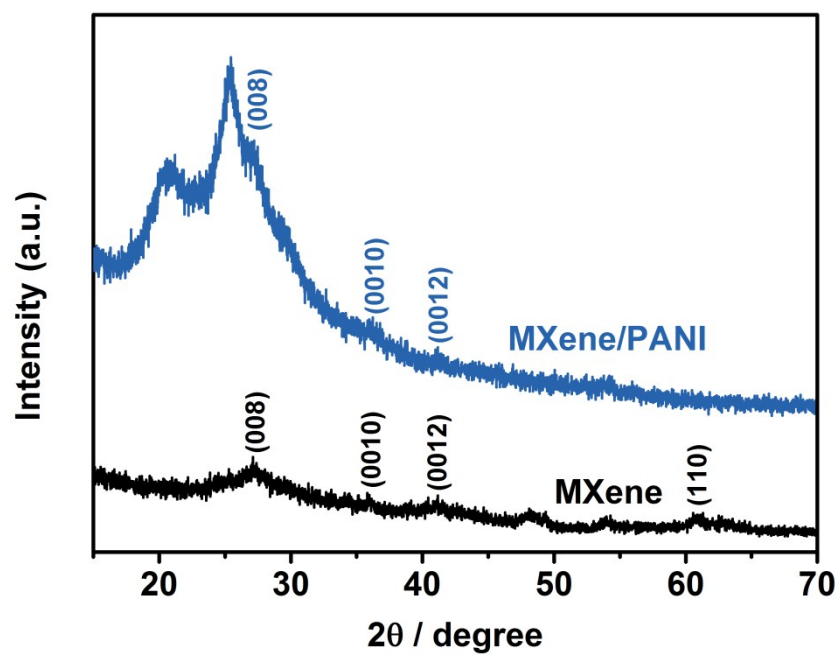

**Fig. S1** XRD patterns of MXene and MXene/PANI.

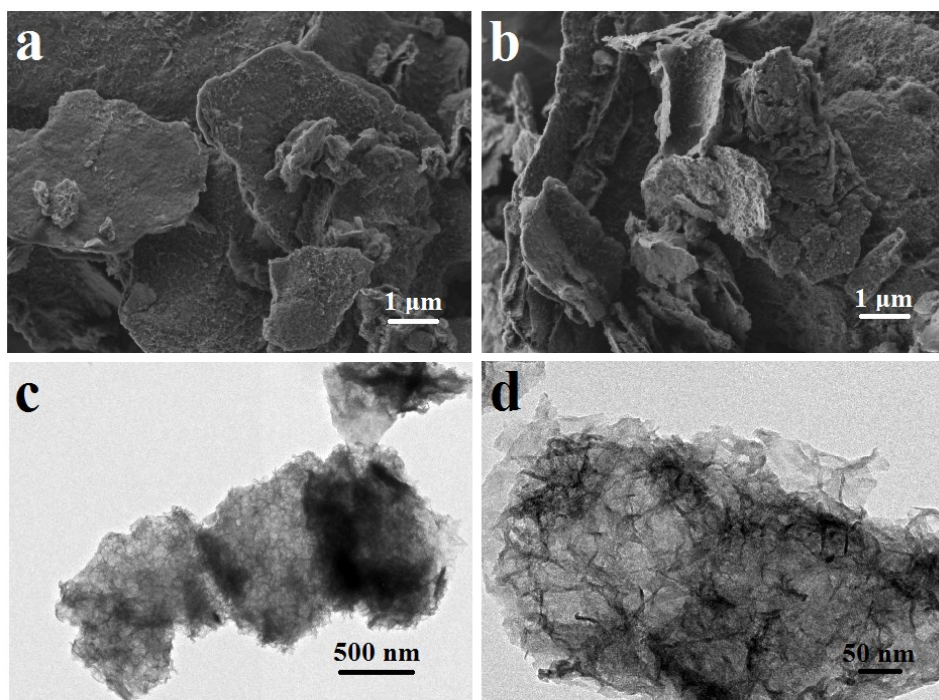

**Fig. S2** (a, b) SEM images of MXene/PANI composite. (c, d) TEM images of MXene/PANI composite.

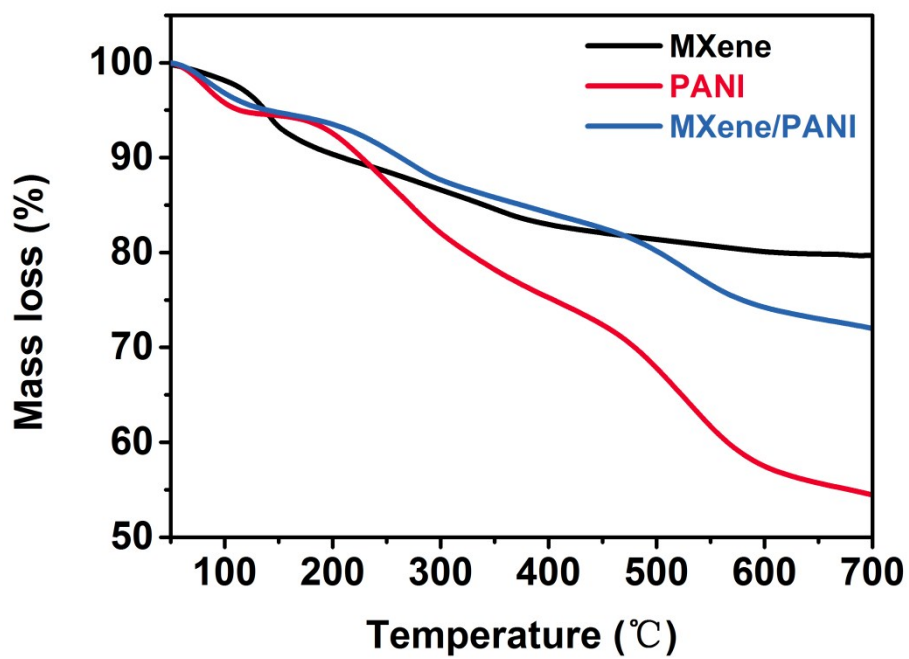

Fig. S3 TGA curves of MXene, PANI and MXene/PANI composite

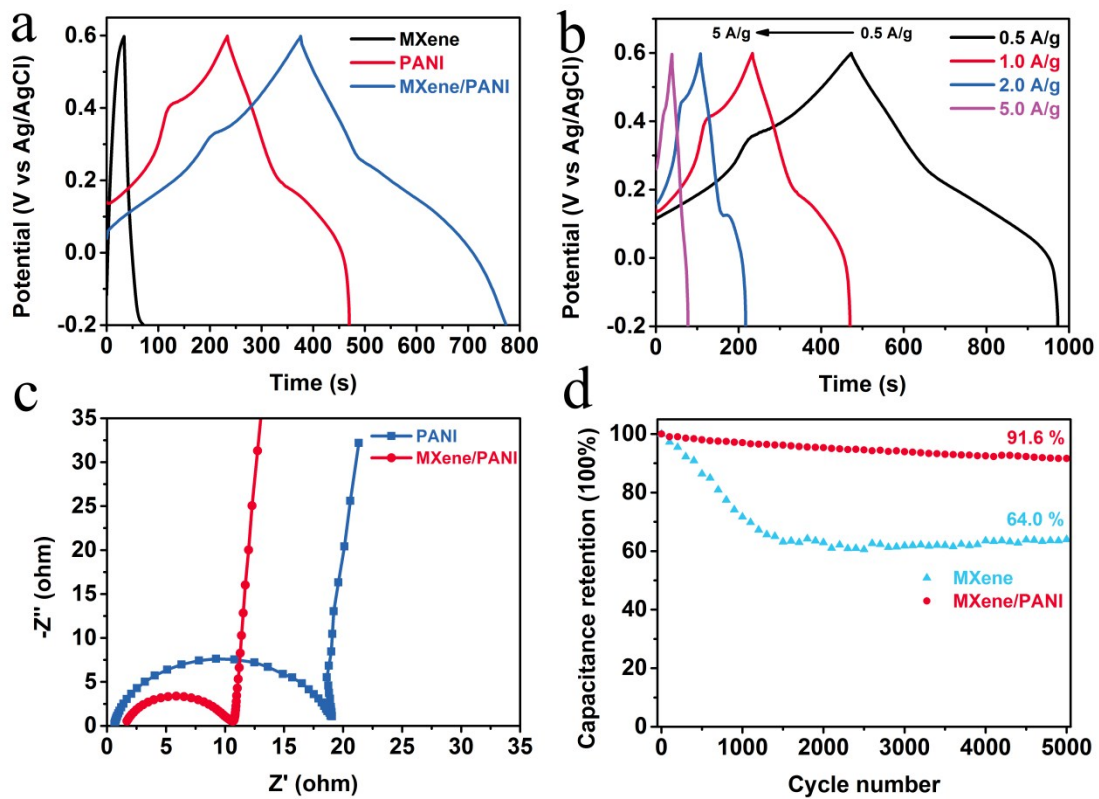

**Fig. S4** (a) GCD curves of MXene, PANI and MXene/PANI electrodes at the current density of  $1 \text{ A g}^{-1}$ . (b) GCD curves of PANI at different current densities. (c) Impedance spectra of PANI and MXene/PANI electrodes. (d) Cycling stability of MXene and MXene/PANI electrodes at the current density of  $5 \text{ A g}^{-1}$ .

Table S1 Comparison of the specific capacitances among other MXene-based composites.

| Electrode materials                                     | Electrolyte                 | Specific capacitance ( $\text{F g}^{-1}$ )      | Reference |
|---------------------------------------------------------|-----------------------------|-------------------------------------------------|-----------|
| $\text{Ti}_3\text{C}_2\text{T}_x/\text{PVA}$            | 1 M KOH                     | $528 \text{ F cm}^{-1} (2 \text{ mV s}^{-1})$   | 19        |
| $\epsilon\text{-MnO}_2/\text{Ti}_3\text{C}_2\text{T}_x$ | 30 wt % KOH                 | $212.1 \text{ F g}^{-1} (1 \text{ A g}^{-1})$   | 20        |
| MXene/CNT paper                                         | 1 M $\text{MgSO}_4$         | $150 \text{ F g}^{-1} (2 \text{ mV s}^{-1})$    | 21        |
| MXene/PPy                                               | 1 M $\text{H}_2\text{SO}_4$ | $416 \text{ F g}^{-1} (5 \text{ mV s}^{-1})$    | 23        |
| MXene/PANI                                              | 1 M $\text{H}_2\text{SO}_4$ | $556.2 \text{ F g}^{-1} (0.5 \text{ A g}^{-1})$ | This work |

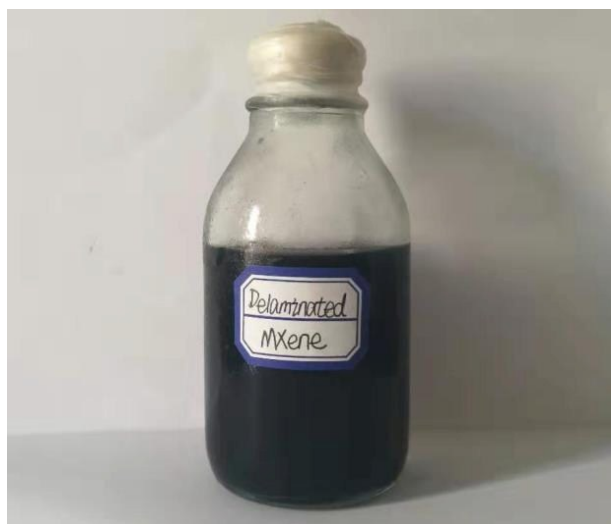

**Fig. S5** Optical image of delaminated MXene solution.
